# Supplementary material for: Antisolvent diffusion-induced growth, equilibrium behaviours in aqueous solution and optical properties of CH3NH3PbI3 single crystals for photovoltaic applications
Source: Royal Society of Chemistry journal article supplement (doi:10.1039/c5ra17579h), 2015-01-01
Supplement: c5ra17579h1.pdf [file c5ra17579h1.pdf]

## Electronic Supplementary Information

### Antisolvent Diffusion-induced Growth, Equilibrium Behaviours in Aqueous Solution and Optical Properties of $\text{CH}_3\text{NH}_3\text{PbI}_3$ Single Crystals for Photovoltaic Applications

Huawei Zhou<sup>a</sup>, Zhonghao Nie<sup>a</sup>, Jie Yin<sup>b</sup>, Yuanwei Sun<sup>a</sup>, Hongyan Zhuo<sup>a</sup>, Da-qi Wang<sup>a</sup>, Dacheng Li<sup>a</sup>, Jianmin Dou<sup>a</sup>, Xianxi Zhang<sup>a\*</sup>, Tingli Ma<sup>c</sup>

<sup>a</sup>Shandong Provincial Key Laboratory of Chemical Energy Storage and Novel Cell Technology, School of Chemistry and Chemical Engineering, Liaocheng University, Liaocheng 252059, China.

<sup>b</sup>College of Materials Science and Engineering, Liaocheng University, Liaocheng 252059, Shandong, China

<sup>c</sup>Graduate School of Life Science and Systems Engineering, Kyushu Institute of Technology, 2-4 Hibikino, Wakamatsu, Kitakyushu, Fukuoka 808-0196, Japan

\* Corresponding authors: zhangxianxi@lcu.edu.cn;

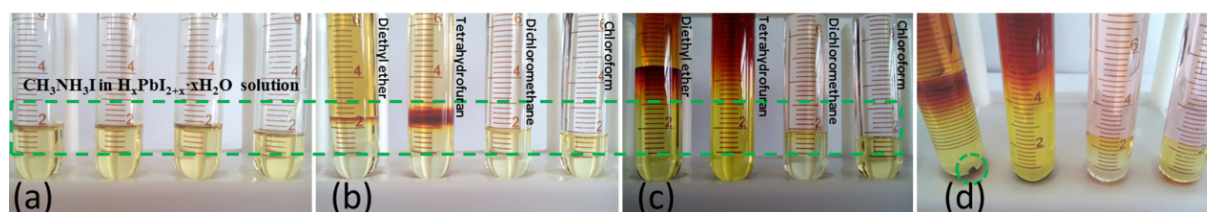

**Figure S1.** Photograph: (a) 40 mg  $\text{CH}_3\text{NH}_3\text{I}$  in 1.82 ml ( $0.1371 \text{ mol L}^{-1}$ )  $\text{H}_x\text{PbI}_{2+x} \cdot x\text{H}_2\text{O}$  solution for single crystal growth, (b) four solvent (diethyl ether, tetrahydrofuran, dichloromethane, chloroform) was inflowed into perovskite precursors, (c) four solvent was inflowed into perovskite precursors after 2 days, (d) different angle view of (c).

### Single Crystal XRD data of CH<sub>3</sub>NH<sub>3</sub>PbI<sub>3</sub>

TITL 150421b in I4/mcm

CELL 0.71073 8.8719 8.8719 12.6770 90.000 90.000

90.000

ZERR 1 0.0015 0.0015 0.0040 0.000 0.000

0.000

LATT 2

SYMM - Y , X , Z

SYMM - X , - Y , Z

SYMM Y , - X , Z

SYMM X , - Y , 0.50000 - Z

SYMM Y , X , 0.50000 - Z

SYMM - X , Y , 0.50000 - Z

SYMM - Y , - X , 0.50000 - Z

SFAC C H N O Cl I Pb

UNIT 20 40 6 5 1 1 1

OMIT -1.00 50.04

L.S. 8

EXTI 0.00891

ACTA

BOND \$H

FMAP 2

PLAN 20

WGHT 0.200000 0.000000

FVAR 0.171190

TEMP 25

Pb1 7 0.000000 0.000000 0.000000 10.125000 0.023370 0.023370 =  
0.000010 0.000000 0.000000 0.000000

I1 6 0.214714 0.285286 0.000000 10.250000 0.099700 0.099700 =  
0.047430 0.000000 0.000000 -0.073430



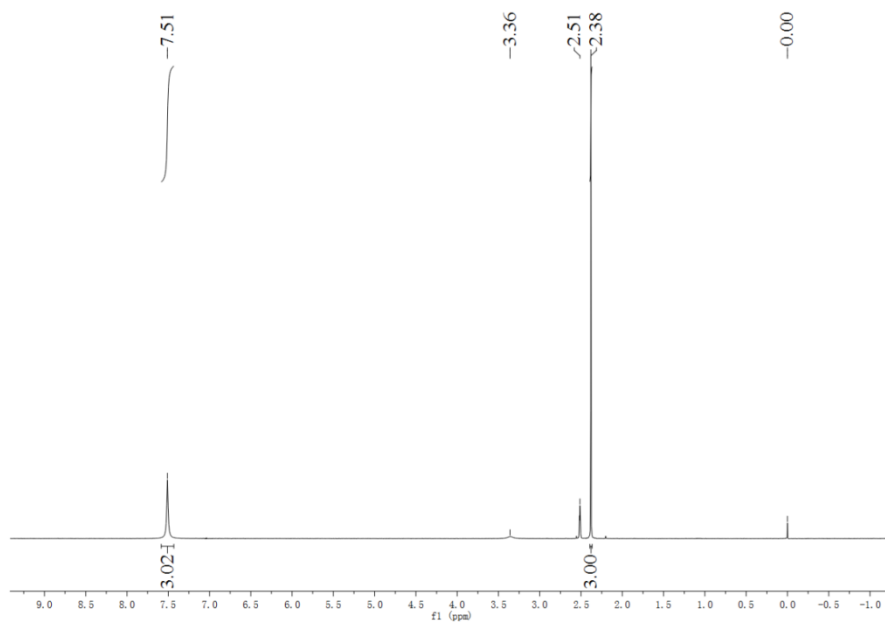

**Figure S2.** NMR of  $\text{CH}_3\text{NH}_3\text{I}$
